# Supplementary material
Source: PubMed Central journal article supplement (PMC4314943)

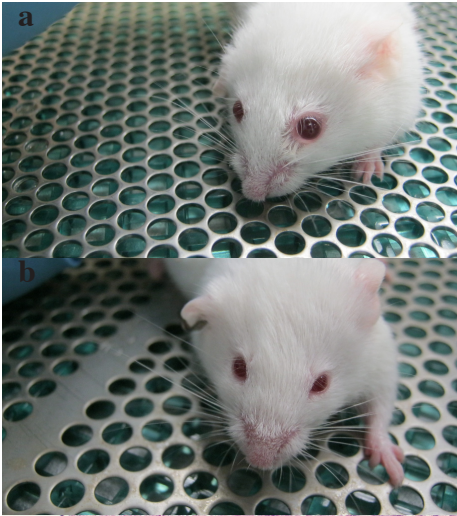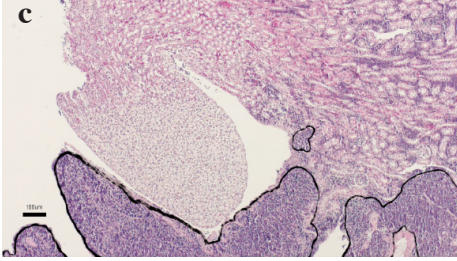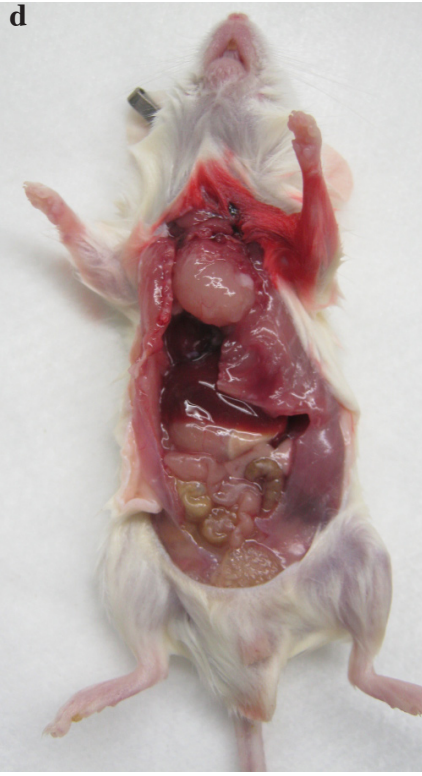

Supplement: NIHMS647003-supplement-Sup_fig_1.pdf [file NIHMS647003-supplement-Sup_fig_1.pdf]

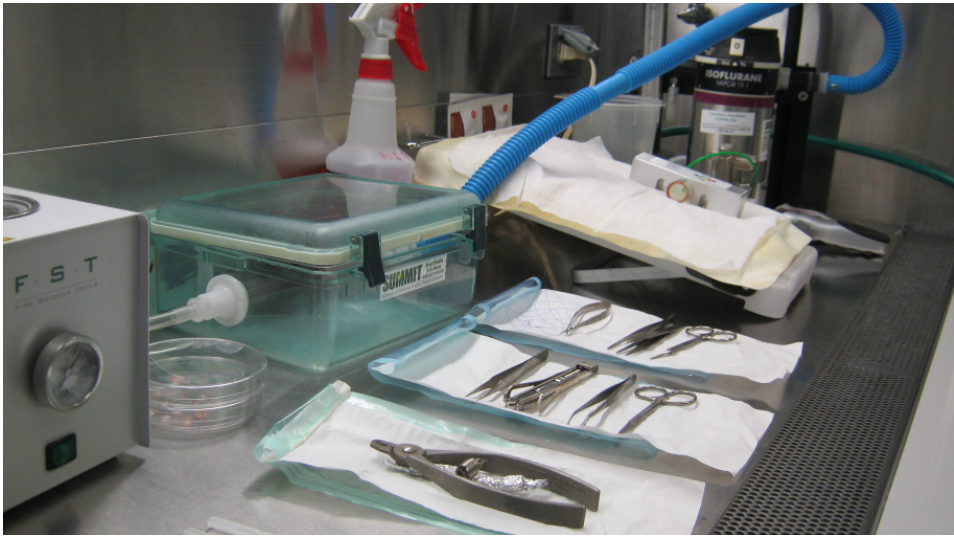

Supplement: NIHMS647003-supplement-Sup_fig_2.pdf [file NIHMS647003-supplement-Sup_fig_2.pdf]
